# Supplementary material for: A comparative study on the tibial morphology among several populations in ancient East Asia
Source: Oxford University Press journal article supplement (doi:10.1525/elementa.2021.00071), 2021-01-01
Supplement: data.xlsx [file data.xlsx]

## Sheet: Tibia
Hanben		Niaosong		Changle
F	M	F	M	F	M
80.0887	61.4025	56.3569	64.4097	66.0325	73.4607
68.2756	76.8249	59.4494	49.3563	68.7395	77.8511
75.2165	69.1932	62.9119	55.139	74.0641	68.7891
70.4653	65.4153	69.0965	57.7361	72.3923	73.7011
61.1075	62.2969	69.634	57.7711	67.7806	72.7097
49.3114	58.158	69.7674	57.991	65.0707	78.7126
64.337	63.4349	70.3575	59.8895	64.318	70.0929
58.4057	56.6591	71.0375	60.4586	69.3452	67.3358
67.1624	61.1661	71.0597	61.5469	62.5254	78.9936
66.6883	70.8988	73.9178	62.367	73.1258	70.3413
62.6697	65.8106	75.7187	63.821	73.776	72.8083
64.92	70.528	76.6302	64.5773	77.2186	64.9929
64.1436	56.0575	81.6393	65.709	61.4972	65.4972
61.001	70.3782	81.7667	73.4568	71.9858	72.807
75.9777	57.233	64.8988	74.1667	72.8932	62.3882
51.1285	56.4256	68.5448	59.4722	74.0903	65.1199
	73.9658	72.3596	59.6705	70.6405	65.6811
	70.5257	81.984	61.3429	79.0986	74.2798
	60.0735	70.9517	61.6045	71.8627	64.4129
	68.1325			70.6944	68.9122
	67.9728			68.762	66.5938
	58.4063			63.8589	74.0011
	65.1935			70.7998	69.2999
	55.8235			77.7854	72.4025
	66.2334			71.9972	65.163
	73.2498			67.2029	65.8354
	67.1727			79.6965	66.5616
	62.3334				72.0357
	80.1445				76.4178
	80.934
	65.4376
	68.5548
	65.9015
	64.7475
	63.1653
	65.5819

## Sheet: Sheet2
		Tibial cnemic
		Male			Female
		L	R	A	L	R	A	L	R	A
Changle	Agricutural	70.08	70.25	70.16	71.14	70.64	70.88	-1.49002	-0.552095	-1.0158
Dahekou	Agricutural	66.13	66.31	66.22	67.49	68.34	67.92	-2.01511	-2.97044	-2.50294
Yinxu	Agricutural	66.37	69.58	68.16	71.13	70.69	70.94	-6.69197	-1.57024	-3.9188
Tuchengzi	Agricutural	66.79	68.2	67.5	68.85	68.56	68.7	-2.99201	-0.525088	-1.74672
Jinggouzi	Nomadic	62.4	59.54	60.97	74.4	68.23	71.32	-16.129	-12.7363	-14.5121
Hanben		64.58	65.74	65.18	67.69	65.72	66.7	-4.59447	0.0304321	-2.27886
Shiqiao		61.83	61.89	61.86	71.49	70.67	71.11	-13.5124	-12.4239	-13.008

## Sheet: Sheet3
	Male	Female
Shiqiao	61.61	70.95
Hanben	65.71	65.06
Changle	70.25	70.64
Tuchengzi	68.2	68.56
Yinxu	69.58	70.69
Dahekou	66.31	68.34
Jinggouzi	59.54	68.23
